# Supplementary material for: A stapled BIM peptide overcomes apoptotic resistance in hematologic cancers
Source: JCI journal article supplement (doi:10.1172/jci46231), 2012-05-24
Supplement: sd1 [file 1]

## Supplementary Information

LaBelle et al.

A Stapled BIM BH3 Helix Overcomes the Apoptotic Resistance of Refractory Hematologic Cancers

### Supplementary Figure Legends

#### Supplementary Table 1

Sequence composition of SAHB peptides. 'X' denotes the positions of the non-natural amino acids within the peptide sequences. (M+3)/3 is the triply-charged molecular ion of each peptide detected during LC/MS purification and corresponds to the predicted molecular weight (MW) of the peptides.

#### Supplementary Figure 1

Circular dichroism of BIM BH3 peptides. BIM SAHB<sub>A</sub>S exhibited marked enhancement of  $\alpha$ -helical structure compared to the corresponding unmodified peptide, as evidenced by the shift in spectral contour from a random coil (single minimum at 195 nm) to an  $\alpha$ -helical pattern (double minima at 208 and 222 nm).  $[\theta]$ , mean residue ellipticity, deg cm<sup>2</sup> dmol<sup>-1</sup>.

#### Supplementary Figure 2

BIM SAHB<sub>A</sub>-triggered, BAX-mediated liposomal release is inhibited by the addition of recombinant anti-apoptotic proteins (A) BCL-X<sub>L</sub> $\Delta$ C, (B) MCL-1 $\Delta$ N $\Delta$ C,

(C) BCL-w $\Delta$ C, and (D) BFL-1/A1 $\Delta$ C (1:1:1 BAX:BIM SAHB<sub>A</sub>:anti-apoptotics, 400 nM). Liposomal release assays were performed in triplicate with similar results.

### Supplementary Figure 3

Solubilized BIM SAHB<sub>A</sub> peptides elute as monomers by gel filtration chromatography. Aprotinin, 6.5 kD.

### Supplementary Figure 4

Uptake of BIM SAHB<sub>A</sub> by human and murine fibroblasts. Cultured WS1 and WT and DKO MEFs were exposed to FITC-BIM SAHB<sub>A</sub> (1  $\mu$ M) for 2 h, followed by PBS washing, trypsinization, repeat PBS washing, lysate preparation, electrophoresis, and fluorescence detection. FITC-BIM SAHB<sub>A</sub> is present in the lysates of all three fibroblast cell lines.

### Supplementary Figure 5

BIM SAHB<sub>A</sub> treatment of fibroblasts at escalated dosing. **(A)** WS1 human fibroblasts treated with 20  $\mu$ M BIM SAHB<sub>A</sub>, but not vehicle or 20  $\mu$ M BIM SAHB<sub>A</sub>(R153D), manifest modestly reduced viability at 24 h with caspase 3/7 activation evident at 6 h. Adherent wild-type **(B)** and DKO **(C)** MEFs show no viability response to vehicle, BIM SAHB<sub>A</sub>, or BIM SAHB<sub>A</sub>(R153D) (20  $\mu$ M) treatment, although measurable caspase 3/7 activation is detected in wild-type, but not DKO, MEFs upon treatment with 20  $\mu$ M BIM SAHB<sub>A</sub>. Data are mean  $\pm$

SEM for experiments performed in at least triplicate. RLU, relative luminescence units

### **Supplementary Figure 6**

Peripheral white blood cell counts from treated cohorts of OCI-AML3 xenograft mice (Figure 7C). Data are mean  $\pm$  SD (n=8 per arm).

### **Supplementary Figure 7**

B-cell infiltrative disease of *Bim*<sup>-/-</sup>-marrow reconstituted *Rag2*<sup>-/-</sup>*γC*<sup>-/-</sup> mice. **(A)** Like native *Bim*<sup>-/-</sup> mice, *Bim*<sup>-/-</sup>-marrow reconstituted *Rag2*<sup>-/-</sup>*γC*<sup>-/-</sup> animals manifest a pervasive hypergammaglobulinemia, as measured by Ig ELISA. **(B)** *Bim*<sup>-/-</sup>-marrow reconstituted *Rag2*<sup>-/-</sup>*γC*<sup>-/-</sup> mice likewise exhibit marked splenomegaly as measured by microultrasound.

### **Supplementary Figure 8**

Spleen weights of treated *Bim*<sup>-/-</sup>-marrow reconstituted *Rag2*<sup>-/-</sup>*γC*<sup>-/-</sup> and wild-type B6/129 mice. Mice were treated intravenously for 5 days with vehicle (5% DMSO/D5W), BIM SAHB<sub>A</sub>, or BIM SAHB<sub>A</sub>(R153D) (10mg/kg/day), and animals and harvested spleens weighed upon sacrifice on day 6. BIM SAHB<sub>A</sub>-treated *Bim*<sup>-/-</sup>-marrow reconstituted *Rag2*<sup>-/-</sup>*γC*<sup>-/-</sup> mice manifested a trend toward decreased spleen weight (p=0.06), which was not observed for vehicle- or BIM SAHB<sub>A</sub>(R153D)-treated animals **(A, B)**. No differences in spleen weights were

observed among the treatment groups of B6/129 mice **(C, D)**. Data are mean  $\pm$  SD (n =4 per arm).

### **Supplementary Figure 9**

Pre- and post-treatment peripheral white blood cell and splenic lymphocyte counts from treated cohorts of wild-type B6/129 mice. **(A)** Absolute white blood cell counts and differential from wild-type B6/129 mice prior to and after 5 day intravenous treatment with vehicle (5% DMSO/D5W), BIM SAHB<sub>A</sub>, or BIM SAHB<sub>A</sub>(R153D) (10 mg/kg/day). Post-treatment peripheral **(B)** and splenocyte **(C)** CD4+ CD8+, and B220+ lymphocyte counts from treated wild-type B6/129 mice. Data are mean  $\pm$  SD (n =4 per arm).

| <u>Peptide</u>                | <u>Sequence</u>                         | <u>Species</u> | <u>N-terminus</u> | <u>(MW)</u> | <u>(M+3)/3</u> |
|-------------------------------|-----------------------------------------|----------------|-------------------|-------------|----------------|
| BIM BH3                       | IWIAQELRRIGDEFNAYYARR                   | Human          | FITC-β-Ala-       | 3098        | 1034.2         |
| BIM SAHB <sub>A</sub>         | IWIAQELR <b>X</b> IGD <b>X</b> FNAYYARR | Human          | Ac                | 2645        | 883.0          |
| BIM SAHB <sub>A</sub>         | IWIAQELR <b>X</b> IGD <b>X</b> FNAYYARR | Human          | FITC-β-Ala-       | 3063        | 1022.5         |
| BIM SAHB <sub>A</sub> (R153D) | IWIAQELD <b>X</b> IGD <b>X</b> FNAYYARR | Human          | Ac                | 2604        | 869.3          |
| BIM SAHB <sub>A</sub> (R153D) | IWIAQELD <b>X</b> IGD <b>X</b> FNAYYARR | Human          | FITC-β-Ala-       | 3022        | 1008.8         |
| BIM SAHB <sub>A</sub>         | IRIAQELR <b>X</b> IGD <b>X</b> FNETYTRR | Murine         | Ac                | 2641        | 881.7          |
| BIM SAHB <sub>A</sub> (R153D) | IRIAQELD <b>X</b> IGD <b>X</b> FNETYTRR | Murine         | Ac                | 2600        | 868.0          |
| BAX SAHB <sub>A</sub>         | ASTKKLSESLK <b>X</b> IGD <b>X</b> LDSN  | Human          | FITC-β-Ala-       | 2614        | 872.7          |
| BAK SAHB <sub>A</sub>         | QVGRQLA <b>X</b> IGD <b>X</b> INRRYD    | Human          | FITC-β-Ala-       | 2582        | 862.0          |

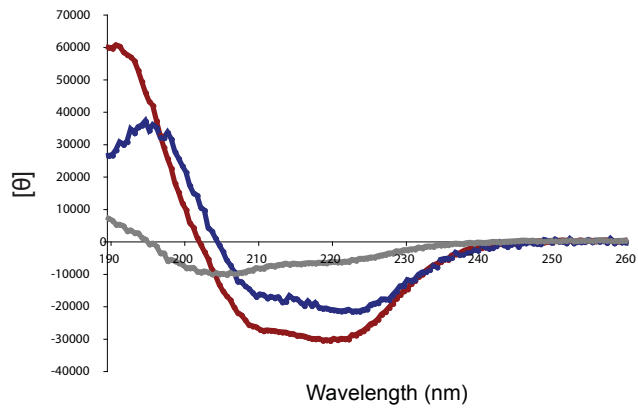

Supplementary Figure 1  
LaBelle et al.

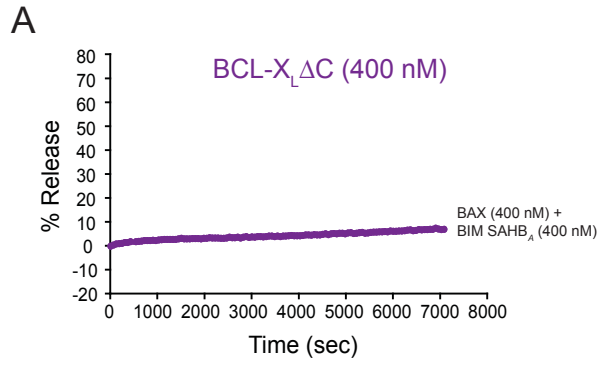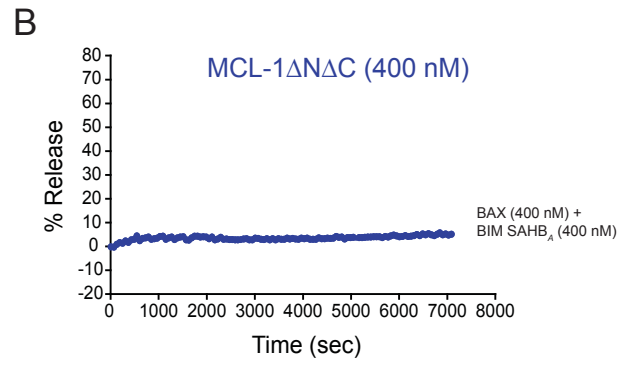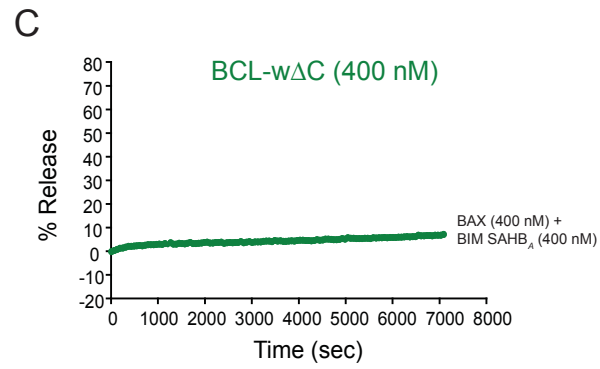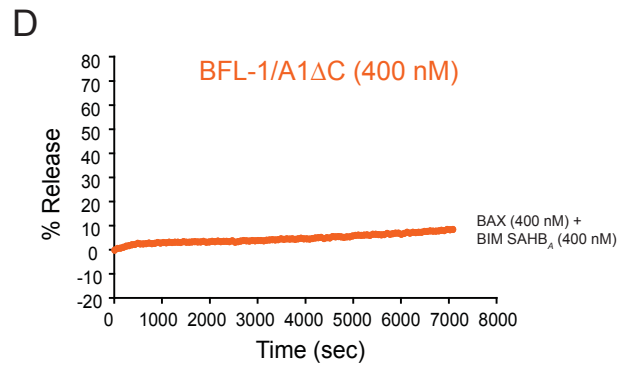

Supplementary Figure 2  
LaBelle et al.

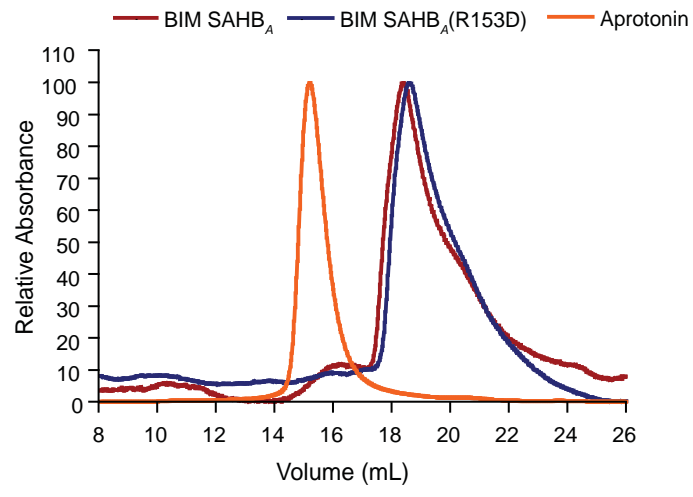

Supplementary Figure 3  
LaBelle et al.



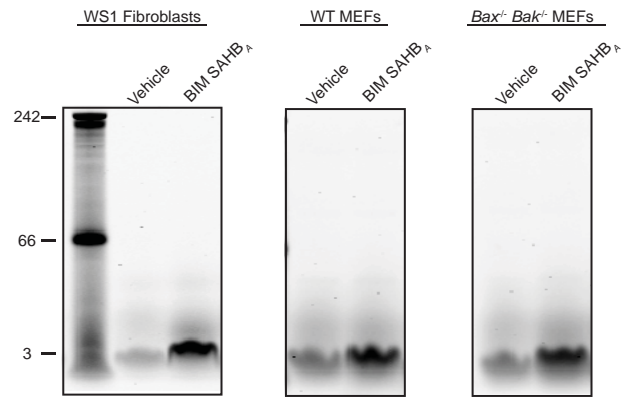

Supplementary Figure 4  
LaBelle et al.

Cell Viability

Activated Caspase 3/7

Vehicle BIM SAHB<sub>A</sub> BIM SAHB<sub>A</sub>(R153D)

A

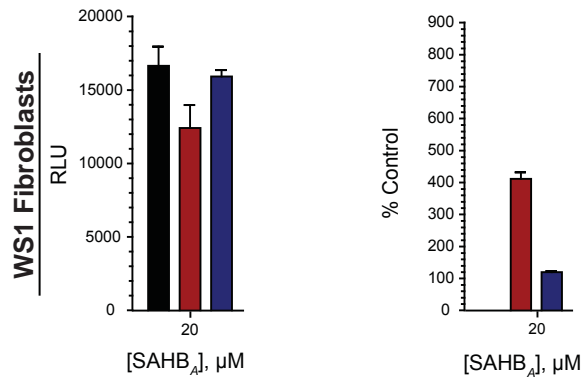

B

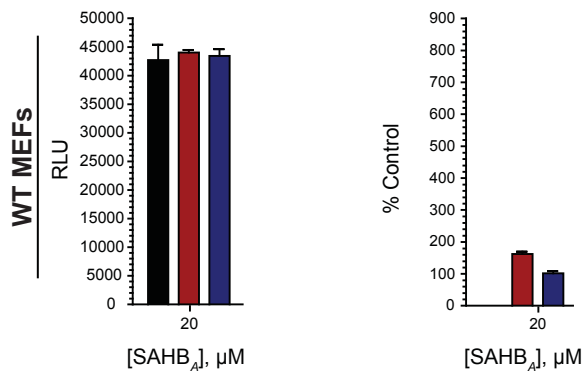

C

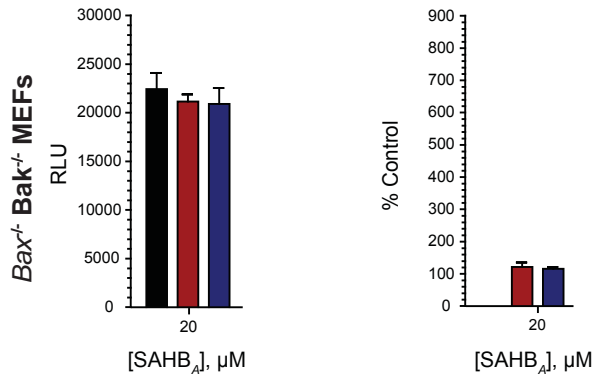

Supplementary Figure 5  
LaBelle et al.

| <u>Treatment</u>                        | <u>WBC</u><br><u>(x 10<sup>3</sup> cells/<math>\mu</math>L)</u> | <u>% Neutrophils</u> | <u>% Lymphocytes</u> | <u>% Monocytes</u> |
|-----------------------------------------|-----------------------------------------------------------------|----------------------|----------------------|--------------------|
| Vehicle                                 | 5.0 ( $\pm$ 1.8)                                                | 30.4 ( $\pm$ 5.8)    | 41.8 ( $\pm$ 5.0)    | 25.8 ( $\pm$ 5.7)  |
| BIM SAHB <sub>A</sub>                   | 3.7 ( $\pm$ 1.2)                                                | 29.1 ( $\pm$ 7.2)    | 40.8 ( $\pm$ 7.1)    | 28.8 ( $\pm$ 5.3)  |
| BIM SAHB <sub>A</sub> (R153D)           | 2.8 ( $\pm$ 1.0)                                                | 32.5 ( $\pm$ 4.6)    | 39.6 ( $\pm$ 7.1)    | 27.1 ( $\pm$ 3.5)  |
| BIM SAHB <sub>A</sub> + ABT-263         | 5.1 ( $\pm$ 4.6)                                                | 27.8 ( $\pm$ 10.5)   | 47.3 ( $\pm$ 13.5)   | 22.7 ( $\pm$ 8.5)  |
| BIM SAHB <sub>A</sub> (R153D) + ABT-263 | 2.7 ( $\pm$ 1.0)                                                | 21.7 ( $\pm$ 6.3)    | 56.2 ( $\pm$ 7.8)    | 21.6 ( $\pm$ 2.7)  |

Supplementary Figure 6  
LaBelle et. al.

A

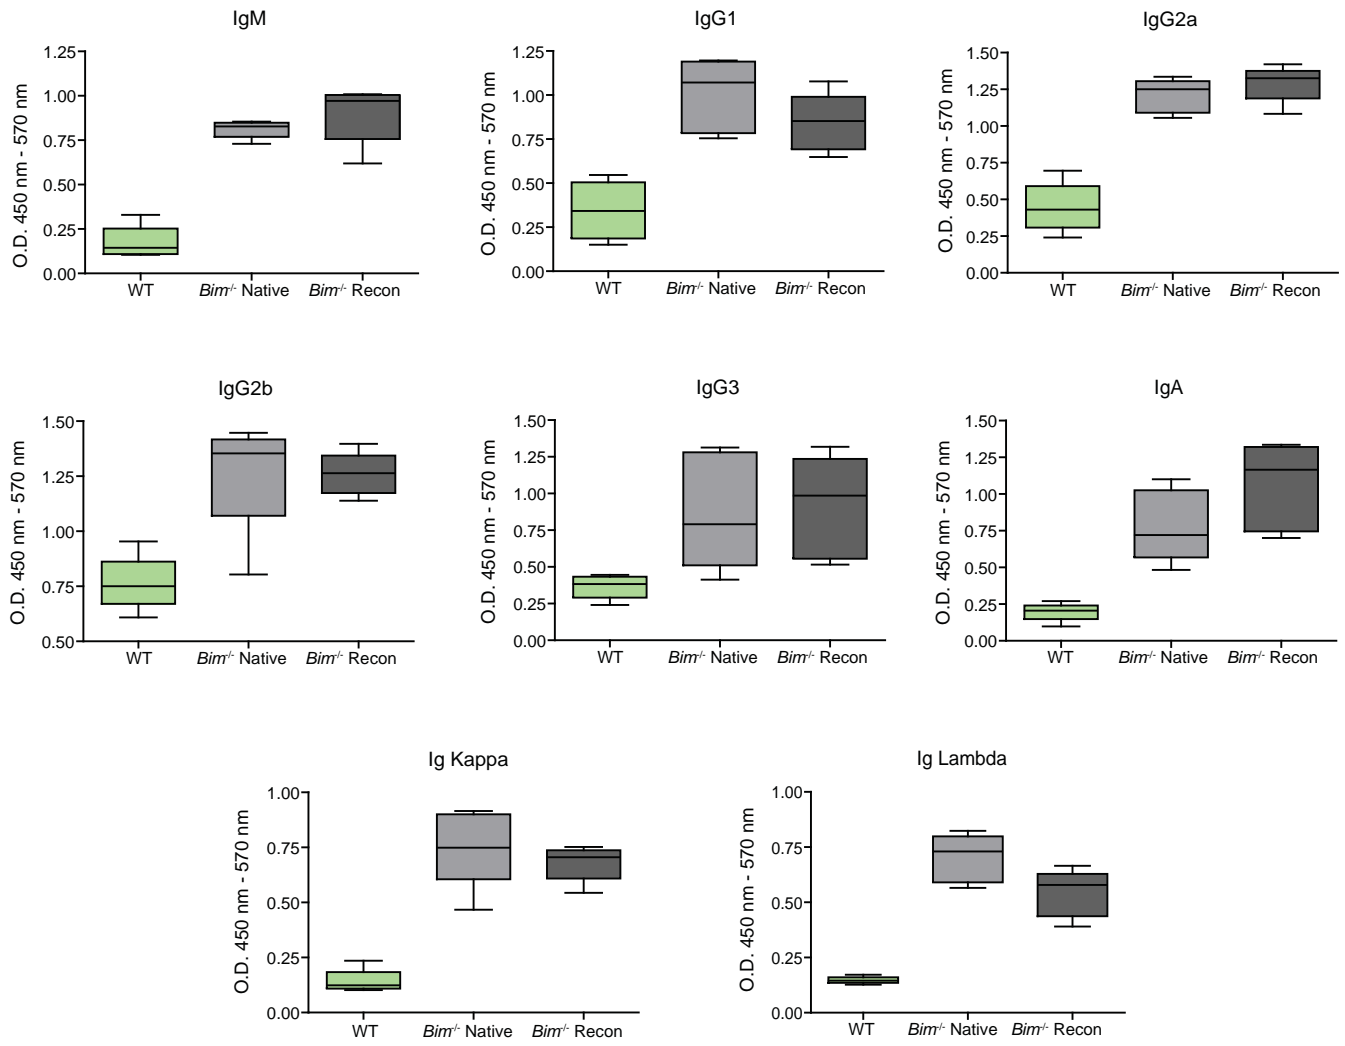

B

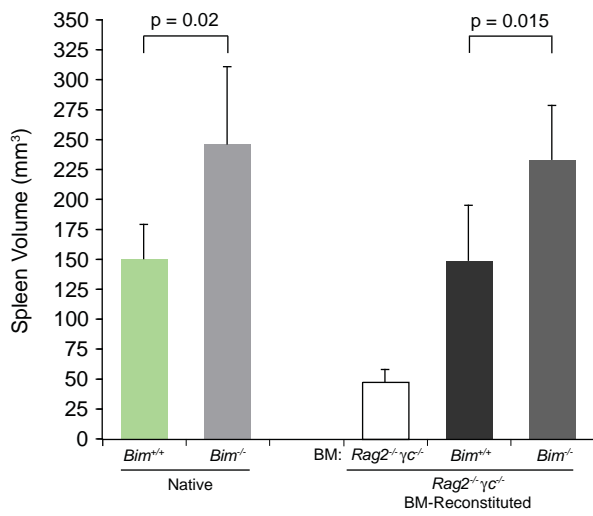

Supplementary Figure 7  
LaBelle et. al.

Vehicle BIM SAHB<sub>A</sub> BIM SAHB<sub>A</sub>(R153D)

A

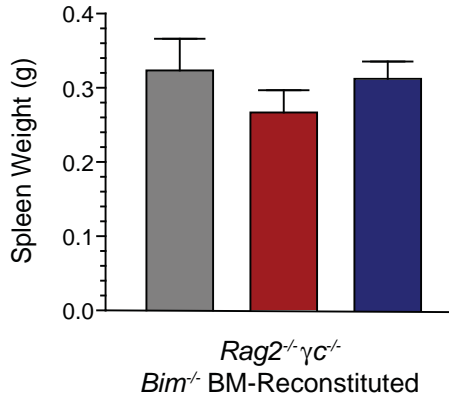

B

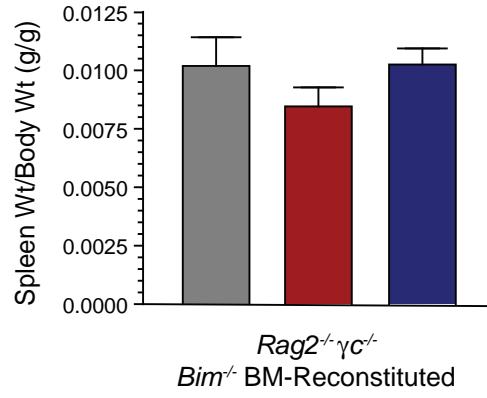

C

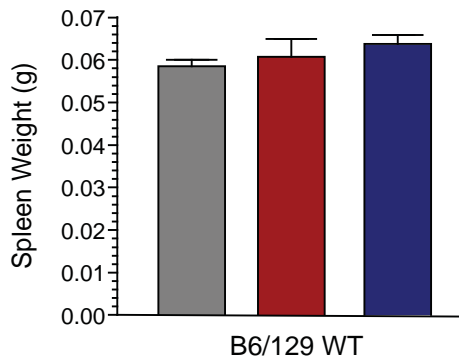

D

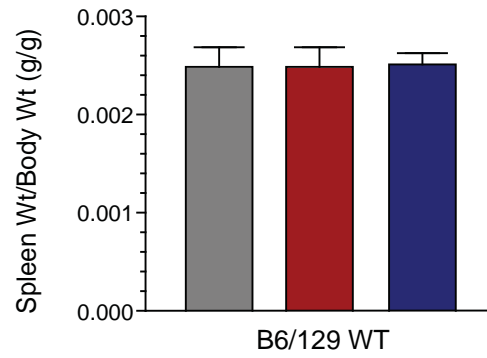

Supplementary Figure 8  
LaBelle et al.

A

|                       | <u>Treatment</u>              | <u>WBC</u><br>(x 10 <sup>3</sup> cells/ $\mu$ L) | <u>% Neutrophils</u> | <u>% Lymphocytes</u> | <u>% Monocytes</u> |
|-----------------------|-------------------------------|--------------------------------------------------|----------------------|----------------------|--------------------|
| <u>Pre-Treatment</u>  | Vehicle                       | 4.7 ( $\pm$ 0.9)                                 | 8.4 ( $\pm$ 1.5)     | 87.6 ( $\pm$ 0.9)    | 1.8 ( $\pm$ 0.7)   |
|                       | BIM SAHB <sub>A</sub>         | 5.6 ( $\pm$ 1.9)                                 | 9.0 ( $\pm$ 2.0)     | 87.0 ( $\pm$ 2.4)    | 1.9 ( $\pm$ 0.4)   |
|                       | BIM SAHB <sub>A</sub> (R153D) | 5.4 ( $\pm$ 0.6)                                 | 9.4 ( $\pm$ 1.6)     | 86.0 ( $\pm$ 1.7)    | 1.9 ( $\pm$ 0.2)   |
| <u>Post-Treatment</u> | Vehicle                       | 6.2 ( $\pm$ 1.1)                                 | 9.8 ( $\pm$ 2.3)     | 82.5 ( $\pm$ 2.8)    | 1.6 ( $\pm$ 0.5)   |
|                       | BIM SAHB <sub>A</sub>         | 7.6 ( $\pm$ 1.1)                                 | 10.4 ( $\pm$ 3.0)    | 80.7 ( $\pm$ 5.4)    | 2.9 ( $\pm$ 1.5)   |
|                       | BIM SAHB <sub>A</sub> (R153D) | 8.1 ( $\pm$ 2.7)                                 | 6.4 ( $\pm$ 1.5)     | 85.4 ( $\pm$ 2.4)    | 1.2 ( $\pm$ 0.4)   |

B

|                         |                               | <u>Lymphocytes (x 10<sup>3</sup> cells/<math>\mu</math>L)</u> |                  |                  |
|-------------------------|-------------------------------|---------------------------------------------------------------|------------------|------------------|
|                         |                               | <u>CD4+</u>                                                   | <u>CD8+</u>      | <u>B220+</u>     |
| <u>Peripheral Blood</u> | Vehicle                       | 0.8 ( $\pm$ 0.1)                                              | 1.1 ( $\pm$ 0.3) | 2.8 ( $\pm$ 0.9) |
|                         | BIM SAHB <sub>A</sub>         | 1.0 ( $\pm$ 0.2)                                              | 1.0 ( $\pm$ 0.2) | 3.6 ( $\pm$ 0.5) |
|                         | BIM SAHB <sub>A</sub> (R153D) | 1.3 ( $\pm$ 0.3)                                              | 1.7 ( $\pm$ 0.4) | 5.2 ( $\pm$ 1.9) |

C

|               |                               | <u>Lymphocytes (%)</u> |                   |                   |
|---------------|-------------------------------|------------------------|-------------------|-------------------|
|               |                               | <u>CD4+</u>            | <u>CD8+</u>       | <u>B220+</u>      |
| <u>Spleen</u> | Vehicle                       | 26.1 ( $\pm$ 1.5)      | 11.7 ( $\pm$ 0.3) | 62.8 ( $\pm$ 0.8) |
|               | BIM SAHB <sub>A</sub>         | 24.3 ( $\pm$ 0.9)      | 10.4 ( $\pm$ 0.8) | 63.1 ( $\pm$ 2.0) |
|               | BIM SAHB <sub>A</sub> (R153D) | 28.3 ( $\pm$ 1.5)      | 11.1 ( $\pm$ 0.5) | 60.0 ( $\pm$ 1.4) |

Supplementary Figure 9  
LaBelle et al.
